# Supplementary material for: Prognostic factors for inpatient functional recovery following total hip and knee arthroplasty: a systematic review
Source: PubMed Central journal article supplement (PMC8023898; doi:10.1080/17453674.2020.1744852), 2020-04-02
Supplement: IORT_A_1744852_SM5787.pdf [file IORT_A_1744852_SM5787.pdf]

## Supplementary data

Table 2. Study characteristics

| Study ID                  | Study design    | Country, number of sites, hospital funding | Arthroplasty type | Population n                         | Mean age (SD), <sup>a</sup> range          | % Female | Prognostic factors  | Validated outcome measures                            |
|---------------------------|-----------------|--------------------------------------------|-------------------|--------------------------------------|--------------------------------------------|----------|---------------------|-------------------------------------------------------|
| Bade et al. 2014          | RCT (2x pooled) | United States, 1, public                   | TKA               | 64                                   | 64.6 (8.5), NR                             | 50       | Patient             | TUG                                                   |
| Carli et al. 2010         | RCT             | Canada, 1, public                          | TKA               | 40                                   | 71 (NR) 55–85                              | 73       | Patient             | Change in 2MWT (POD3–POD1)                            |
| Carmichael et al. 2013    | RCT             | Canada, 1, public                          | THA               | 47                                   | 60.2 <sub>p</sub> (12.8) <sub>p</sub> , NR | 39       | Surgical            | WOMAC                                                 |
| Den Hertog et al. 2012    | CCS             | Germany, 1, NR                             | TKA               | 147                                  | 67.4 <sub>p</sub> (8.1) <sub>p</sub> , NR  | 71       | Surgical            | WOMAC<br>AKSS                                         |
| Elings et al. 2016        | PCS             | Netherlands, 2, public                     | THA               | 154 <sup>c</sup><br>271 <sup>d</sup> | 70.5 <sub>p</sub> (9.0) <sub>p</sub> , NR  | 70       | Patient             | mILAS                                                 |
| Fransen et al. 2018       | RCT             | Netherlands, 1, public                     | TKA               | 50                                   | 62.5 <sub>p</sub> (8.1) <sub>p</sub> , NR  | 60       | Surgical            | TUG<br>SF-12<br>KOOS                                  |
| Hoogbeem et al. 2015      | PCS             | United States, 1, private                  | TKA               | 193                                  | 65 (10), NR                                | 64       | Patient<br>Surgical | mILAS                                                 |
| Ilfeld et al. 2008        | RCT             | United States, 2, private                  | TKA               | 50                                   | 65 (NR), 60–70                             | 58       | Surgical            | 6MWT                                                  |
| Kennedy et al. 2006       | PCS             | Canada, 1 public                           | THA TKA           | 152                                  | 63.8 <sub>p</sub> (9.7) <sub>p</sub> , NR  | 49       | Patient<br>Surgical | TUG<br>6MWT<br>WOMAC pain<br>WOMAC function           |
| Kennedy et al. 2011       | PCS             | Canada, 1, public                          | THA               | 75                                   | 54, 62, 68 (f), NR<br>52, 60, 70 (m), NR   | 43       | Patient             | 6MWT<br>LEFS                                          |
| Kessler and Kafer 2007    | PCS             | Germany, 1, public                         | THA               | 67                                   | 63.6 (NR), 37–77                           | 45       | Patient<br>Surgical | WOMAC pain<br>WOMAC function<br>WOMAC stiffness       |
| Maiorano et al. 2017      | RCS             | Italy, 1, private                          | TKA               | 353                                  | 71.6 <sub>p</sub> (8.2) <sub>p</sub> , NR  | 73       | Patient             | Change in MBI                                         |
| Morri et al. 2016         | PCS             | Italy, 1, public and private               | THA               | 167                                  | 60.8 (12.7), NR                            | 62       | Patient             | ILAS                                                  |
| Ogonda et al. 2005        | RCT             | United Kingdom, 1, public                  | THA               | 219                                  | 66.6 <sub>p</sub> (10.1) <sub>p</sub> , NR | 51       | Surgical            | mILAS<br>10mWT<br>SCT (ascending)<br>SCT (descending) |
| Salmon et al. 2001a       | PCS             | United Kingdom, 2, public                  | THA               | 102                                  | 69 (11), NR                                | 62       | Patient             | 10mWT<br>25mWT                                        |
| Van der Sluis et al. 2017 | PCS             | Netherlands, 1, public                     | TKA               | 682                                  | 70 <sub>p</sub> (9.1) <sub>p</sub> , 41–89 | 73       | Patient             | mILAS                                                 |
| Wang et al. 1998          | PCS             | Australia, 1, private                      | THA               | 65                                   | 71 (NR), 47–87                             | 48       | Patient             | MBI                                                   |

<sup>a</sup> Subscript p = pooled; f = female; m = male; NR: not reported.

<sup>b</sup> AKSS: American Knee Society Score, CCS: case control study, ILAS: Iowa Level of Assistance Scale, KOOS: Knee injury and Osteoarthritis Outcome Score, LEFS: Lower Extremity Functional Scale, mILAS: modified Iowa Level of Assistance Scale, MBI: Modified Barthel Index, PCS: prospective cohort study, POD: postoperative day, RCS: retrospective cohort study, RCT: randomized controlled trial, SCT: stair climbing test, SD: standard deviation, SF-12: Short form 12 health survey, THA: total hip arthroplasty, TKA: total knee arthroplasty, TUG: Timed Up and Go, WOMAC: Western Ontario and McMaster Universities Osteoarthritis Index, 2MWT: 2-minute walk test, 6MWT: 6-minute walk test, 10mWT: 10-meter walk test, 25mWT: 25-meter walk test.

<sup>c</sup> Data set A. <sup>d</sup> DATA set B.

Table 3. Patient-related prognostic factors for inpatient functional recovery

| Study ID               | Arthroplasty type | Individual prognostic factors                                                                                                                                                                                                                                                                                                                                            | Outcomes assessed                                                                                    | Timepoint of assessment                                                        | Association with functional outcome (95% CI)                                                                                                                                                                                                                                                     | Methodological quality of study |
|------------------------|-------------------|--------------------------------------------------------------------------------------------------------------------------------------------------------------------------------------------------------------------------------------------------------------------------------------------------------------------------------------------------------------------------|------------------------------------------------------------------------------------------------------|--------------------------------------------------------------------------------|--------------------------------------------------------------------------------------------------------------------------------------------------------------------------------------------------------------------------------------------------------------------------------------------------|---------------------------------|
| Bade et al. 2014       | TKA               | Age<br>Sex<br>TUG <sup>a</sup><br>6MWT <sup>a</sup>                                                                                                                                                                                                                                                                                                                      | TUG                                                                                                  | POD 2                                                                          | NR<br>NR<br>$\beta$ : -61 (CI -107 to -14) <sup>c</sup><br>NR                                                                                                                                                                                                                                    | High                            |
| Carli et al. 2010      | TKA               | Age<br>Body weight<br>ASA grade 2<br>CHAMPS <sup>b</sup><br>WOMAC function ss <sup>b</sup><br>Knee Society evaluation <sup>b</sup><br>SF-12 <sup>b</sup><br>Log 2MWT <sup>a</sup><br>Total walking time <sup>b</sup><br>(POD1+ POD 2+ POD3)                                                                                                                              | Change in 2MWT<br>(POD3-POD1)                                                                        | POD 1, 2, 3                                                                    | NR<br>$\beta$ : 0.27 (CI 0.07-0.48) <sup>c</sup><br>$\beta$ : -10.6 (CI -20.8 to -0.4) <sup>c</sup><br>NR<br>NR<br>NR<br>NR<br>$\beta$ : 10.3 (CI 3.1-17.5) <sup>c</sup><br>$\beta$ : 0.2 (CI 0.05-0.4) <sup>c</sup>                                                                             | High                            |
| Elings et al. 2016     | THA               | Age (> 70 years)<br>Sex<br>BMI<br>ASA grade<br>Charnley class<br>WOMAC pain ss <sup>b</sup><br>WOMAC stiffness ss <sup>b</sup><br>WOMAC function ss <sup>b</sup><br>Pain scale <sup>b</sup><br>Patient-estimated walking capacity (mins) <sup>b</sup><br>6MWT <sup>a</sup><br>Chair-rise time <sup>a</sup><br>Quads power (dynamometer) <sup>a</sup><br>TUG <sup>a</sup> | mILAS (considered delayed recovery if > 5 days to achieve score of 0-1)                              | Daily<br><br><br><br><br><br><br><br><br><br>NR                                | OR: 1.2 (CI 0.4-3.4) <sup>c</sup><br>OR: 0.8 (CI 0.2-2.6) <sup>c</sup><br>OR: 2.2 (CI 0.7-7.4) <sup>c</sup><br>OR: 1.2 (CI 0.3-4.4) <sup>c</sup><br>OR: 6.1 (CI 2.2-17.4) <sup>c</sup><br>NR<br>NR<br>NR<br>NR<br>NR<br>NR<br>NR<br>OR: 3.1 (CI 1.1-9.0) <sup>c</sup><br>AUC = 0.82 (CI 0.7-0.9) | High                            |
| Hoogeboom et al. 2015  | TKA               | Age<br>Sex<br>BMI<br>Marital status<br>Employment status                                                                                                                                                                                                                                                                                                                 | mILAS (considered delayed recovery if score > 6 on discharge or not attained 0-6 by afternoon POD 2) | Daily per transfer                                                             | OR: 1.08 (CI 1.04-1.1) <sup>c</sup><br>OR: 2.1 (CI 1.1-4.0) <sup>c</sup><br>OR: 1.1 (CI 1.06-1.2) <sup>c</sup><br>NR<br>NR<br>(AUC = 0.72: 0.65, 0.80)                                                                                                                                           | High                            |
| Kennedy et al. 2006    | THA, TKA          | Age<br>Sex<br><br>BMI<br>Number of comorbidities<br>TUG <sup>a</sup><br>6MWT <sup>a</sup><br>WOMAC pain ss <sup>b</sup><br>WOMAC function ss <sup>b</sup>                                                                                                                                                                                                                | TUG<br>6MWT<br>WOMAC pain<br>WOMAC function                                                          | Not standardized<br>1st time point at hospital DC (generally at 1 week postop) | NR, <i>ns</i><br>$p \leq 0.003$ ( for TUG and 6MWT at 1 week postop) <sup>c</sup><br>NR, <i>ns</i><br>NR, <i>ns</i><br>$p \leq 0.001$ (TUG at 1 week postop) <sup>c</sup><br>$p \leq 0.001$ (6MWT at 1 week postop) <sup>c</sup><br>NR<br>NR                                                     | Medium                          |
| Kennedy et al. 2011    | THA               | Age<br>Sex<br>BMI<br>LEFS <sup>b</sup><br>6MWT <sup>a</sup>                                                                                                                                                                                                                                                                                                              | 6MWT<br>LEFS                                                                                         | Not standardized<br>Appears 1st time point 2 weeks postop                      | NR, <i>ns</i><br>NR, <i>ns</i><br>NR, <i>ns</i><br>NR, <i>ns</i><br>$\beta$ : 0.6 (CI 0.3-0.9) <sup>c</sup> (6MWT, f)<br>$\beta$ : 0.6 (CI 0.4-0.7) <sup>c</sup> (6MWT, m)                                                                                                                       | Low                             |
| Kessler and Kafer 2007 | THA               | Age<br>Sex<br>BMI<br>Affected side<br>WOMAC pain, function and stiffness ss <sup>b</sup>                                                                                                                                                                                                                                                                                 | WOMAC pain, function and stiffness ss                                                                | POD 10                                                                         | OR: -0.01 (CI -0.5-0.5), <i>ns</i><br>OR: -11.9 (CI -22.7 to -1.1) <sup>c</sup><br>OR: -0.2 (CI -1.2-0.9), <i>ns</i><br>OR: 7.2 (CI -2.7-17.1), <i>ns</i><br>OR: 0.3 (CI 0.1-0.6) <sup>c</sup>                                                                                                   | Medium                          |

Table 3 continued

| Study ID                  | Arthroplasty type | Individual prognostic factors                                                                                                          | Outcomes assessed                                                                                                                                                                                                                                                | Timepoint of assessment                                   | Association with functional outcome (95% CI)                                                                                                                                                                                                                    | Methodological quality of study |
|---------------------------|-------------------|----------------------------------------------------------------------------------------------------------------------------------------|------------------------------------------------------------------------------------------------------------------------------------------------------------------------------------------------------------------------------------------------------------------|-----------------------------------------------------------|-----------------------------------------------------------------------------------------------------------------------------------------------------------------------------------------------------------------------------------------------------------------|---------------------------------|
| Maiorano et al. 2017      | TKA               | Age<br>BMI<br>Charlson index<br>Depressive disorder<br>Other TKA or THA<br>Hemoglobin level<br>MBI <sup>a</sup>                        | Change in MBI                                                                                                                                                                                                                                                    | POD 3 and on discharge from rehab                         | $\beta$ : -0.3 (CI -0.4 to -0.2) <sup>c</sup> (f), <i>ns</i> (m)<br>NR, <i>ns</i><br>NR, <i>ns</i><br>NR, <i>ns</i><br>NR, <i>ns</i><br>NR, <i>ns</i><br>$\beta$ : -0.8 (CI -0.9 to -0.7) <sup>c</sup> (f)<br>$\beta$ : -0.8 (CI -0.9 to -0.8) <sup>c</sup> (m) | Medium                          |
| Morri et al. 2016         | THA               | Age<br>Sex<br>ASA grade                                                                                                                | ILAS                                                                                                                                                                                                                                                             | During last 24 hours of hospital stay (LOS $\leq$ 7 days) | $\beta$ : -2.9 (CI -4.8 to -1.0) <sup>c</sup><br>$\beta$ : 0.2 (CI 0.1-0.2) <sup>c</sup><br>NR                                                                                                                                                                  | Low                             |
| Salmon et al. 2001a       | THA               | POMS <sup>b</sup><br>WOMAC pain ss <sup>b</sup><br>WOMAC stiffness ss <sup>b</sup><br>WOMAC function ss <sup>b</sup>                   | 10mWT<br>25mWT<br>(inpatient recovery scored as number of days to achieve milestones)                                                                                                                                                                            | Unclear<br>? Daily                                        | NR, <i>ns</i><br>NR, <i>ns</i><br>NR, <i>ns</i><br>NR, <i>ns</i>                                                                                                                                                                                                | Low                             |
| Van der Sluis et al. 2017 | TKA               | Age<br>Sex<br>BMI<br>ASA grade<br>Charnley class<br>ISAR score<br>Presence of stairs at home<br>TUG <sup>a</sup><br>DEMMI <sup>a</sup> | mILAS functional recovery assessed as number of days to achieve score 0-6: considered delayed recovery if took:<br>> 6 days (1st pathway),<br>4 days (2nd pathway),<br>3 days (3rd pathway)<br>Data collected over 9 years; pathway updated over this time frame | Daily                                                     | OR: 1.06 (CI 1.04-1.09) <sup>c</sup><br>NR<br>OR: 1.04 (CI 1.00-1.08), <i>ns</i><br>OR: 2.5 (CI 1.5-4.0) <sup>c</sup><br>NR<br>OR: 1.6 (CI 1.4-2.0) <sup>c</sup><br>NR<br>OR: 1.10 (CI 1.06-1.15) <sup>c</sup><br>OR: 0.96 (CI 0.95-0.98) <sup>c</sup>          | High                            |
| Wang et al. 1998          | THA               | Age<br>Number of comorbidities<br>MBI <sup>a</sup><br>Hip strength (dynamometer) <sup>a</sup>                                          | MBI (considered extended LOS if not achieving $\geq$ 90 by POD 10)<br>Hip strength                                                                                                                                                                               | POD 3, 5, 8, 10                                           | OR: 3.9 (CI 0.6-27.8), <i>ns</i><br>OR: 2.0 (CI 0.5-7.4), <i>ns</i><br>OR: 6.0 (CI 1.3-28.3) <sup>c</sup><br>OR: 4.0 (CI 1.0-16.1), <i>ns</i>                                                                                                                   | Medium                          |

<sup>a</sup> Functional performance measure.

<sup>b</sup> Patient-reported outcome measure (PROM).

<sup>c</sup> Indicates significance at 0.05 level.

ASA: American Society of Anesthesiologists, BMI: body mass index, CHAMPS: Community Health Activities Model Program for Seniors, CI: 95% confidence interval, DEMMI: de Morton Mobility Index, f: female sex, ILAS: Iowa Level of Assistance Scale, ISAR: Identification of Seniors At Risk, LEFS: Lower Extremity Functional Scale, MBI: Modified Barthel Index, m: male sex, mILAS: modified Iowa Level of Assistance Scale, *ns*: not significant, NR: not reported, POD: postoperative day, POMS: Profile of Mood States, SF-12: Short form 12 health survey, THA: total hip arthroplasty, TKA: total knee arthroplasty, TUG: Timed Up and Go, WOMAC: Western Ontario and McMaster Universities Osteoarthritis Index (ss = subscale), 2MWT: 2-minute walk test, 6MWT: 6-minute walk test, 10mWT: 10-meter walk test, 25mWT: 25-meter walk test.

Table 4. Surgical prognostic factors for inpatient functional recovery

| Study ID               | Arthroplasty type | Individual prognostic factors                                                                                                                                                  | Outcomes assessed (within 2-week postoperative time frame)                                                          | Timepoint of assessment | Association with functional outcome (95% CI)                                                                                                                                                                                                       | Methodological quality of study |
|------------------------|-------------------|--------------------------------------------------------------------------------------------------------------------------------------------------------------------------------|---------------------------------------------------------------------------------------------------------------------|-------------------------|----------------------------------------------------------------------------------------------------------------------------------------------------------------------------------------------------------------------------------------------------|---------------------------------|
| Carli et al. 2010      | TKA               | Anesthesia type:<br>– continuous FNB<br>– periarticular LIA                                                                                                                    | Change in 2MWT distance (POD3–POD1)                                                                                 | POD 1, 2, 3             | NR (except for $p = 0.3$ ), <i>ns</i>                                                                                                                                                                                                              | High                            |
| Carmichael et al. 2013 | THA               | Analgesia type:<br>– pregabalin/celecoxib<br>– placebo/placebo                                                                                                                 | WOMAC                                                                                                               | 1-week postop           | NR                                                                                                                                                                                                                                                 | Medium                          |
| Den Hertog et al. 2012 | TKA               | Fast-track protocol <sup>c</sup>                                                                                                                                               | WOMAC<br>AKSS                                                                                                       | POD 5–7                 | NR (except for $p < 0.0001$ ) <sup>a</sup><br>NR (except for $p < 0.0001$ ) <sup>a</sup><br>Results reported for per protocol cohort only.<br>ITT cohort results NR                                                                                | High                            |
| Fransen et al. 2018    | TKA               | Fast-track protocol <sup>d</sup>                                                                                                                                               | TUG<br>SF-12<br>KOOS                                                                                                | 2 weeks postop          | NR (except for $p = 0.02$ ) <sup>a</sup><br>NR, <i>ns</i><br>NR, <i>ns</i>                                                                                                                                                                         | Medium                          |
| Hoogeboom et al. 2015  | TKA               | Blood loss<br>Tourniquet time<br>Surgeon experience<br>Anesthesia type:<br>– continuous FNB<br>– single-shot FNB<br>– general<br>– spinal<br>Analgesia type:<br>– morphine use | mILAS (considered delayed recovery if score > 6 on discharge or not attained 0–6 by afternoon POD 2)                | Daily per transfer      | OR: 1.00 (CI 0.99–1.01), <i>ns</i><br>OR: 0.99 (CI 0.98–1.01), <i>ns</i><br>OR: 0.36 (CI 0.20–0.66), <i>ns</i><br><br>NR<br>NR<br>NR<br>NR<br><br>OR: 0.95 (CI 0.45–2.01), <i>ns</i>                                                               | High                            |
| Ilfeld et al. 2008     | TKA               | Anesthesia type:<br>– overnight FNB<br>– 4-day ambulatory FNB                                                                                                                  | 6MWT                                                                                                                | Afternoon<br>POD 1      | OR: 1.2 (CI 0.7–1.9), <i>ns</i>                                                                                                                                                                                                                    | Medium                          |
| Kennedy et al. 2006    | TKA,<br>THA       | Site of arthroplasty                                                                                                                                                           | TUG<br><br>6MWT<br>WOMAC pain<br>WOMAC function                                                                     | Variable                | NR (for TUG and 6MWT at 1 week postop) <sup>b</sup><br>NR<br>NR <sup>b</sup><br>NR, <i>ns</i>                                                                                                                                                      | Medium                          |
| Kessler and Kafer 2007 | THA               | Anchorage of implant<br>Duration of surgery                                                                                                                                    | WOMAC pain, function, and stiffness subscales                                                                       | POD 10                  | OR: 4.4 (CI –2.2–11.1), <i>ns</i><br>OR: –0.16 (CI –0.46–0.14), <i>ns</i>                                                                                                                                                                          | Medium                          |
| Ogonda et al. 2005     | THA               | Incision size                                                                                                                                                                  | mILAS (3x tasks):<br>– supine to sit<br>– sit to stand<br>– walking<br>10mWT<br>SCT (ascending)<br>SCT (descending) | POD 2                   | NR (except for $p = 0.3$ ), <i>ns</i><br>NR (except for $p = 0.3$ ), <i>ns</i><br>NR (except for $p = 0.5$ ), <i>ns</i><br>NR (except for $p = 1.0$ ), <i>ns</i><br>NR (except for $p = 0.8$ ), <i>ns</i><br>NR (except for $p = 0.2$ ), <i>ns</i> | High                            |

<sup>a</sup> indicates significance at 0.05 level.

<sup>b</sup> indicates significance according to the authors but level of significance not reported or determinable.

<sup>c</sup> Fast-track rehabilitation versus standard rehabilitation: day of surgery mobilization versus mobilization day 2 postop, 2-hour versus 1-hour physiotherapy sessions, group therapy focusing on activities of daily living (ADL) versus individual. Fast-track group also received positive affirmation, encouraged comparison of progress with other patients (competitive care), had known goal length of hospital stay (LOS) and individual case management for discharge planning.

<sup>d</sup> Fast-track protocol vs. regular protocol: spinal vs. general anesthesia, sub-vastus versus medial parapatellar surgical approach, use of patella in-place balancing versus no patella in-place balancing, extent of soft tissue release, no tourniquet versus tourniquet use, no attachments versus standard attachments (patient-controlled analgesia, wound drain, indwelling catheter), use of intraoperative LIA versus no LIA, use of ice packs versus no ice packs, Day 0 versus day 1 mobilization, prn use versus standard use of short-acting opiates.

AKSS: American Knee Society Score, CI: 95% confidence interval, FNB: femoral nerve block, KOOS: Knee injury and Osteoarthritis Outcome Score, LIA: local infiltration anesthesia, mILAS: modified Iowa Level of Assistance scale, *ns*: not significant, NR: not reported, POD: postoperative day, SCT: stair climbing test, SF-12: Short form 12 health survey, THA: total hip arthroplasty, TKA: total knee arthroplasty, TUG: Timed Up and Go, WOMAC: Western Ontario and McMaster Universities Osteoarthritis Index, 2MWT: 2-minute walk test, 6MWT: 6-minute walk test, 10mWT: 10-meter walk test.

Table 5. Best evidence synthesis for total hip arthroplasty prognostic factors

| Individual prognostic factors | Study ID, statistical significance                                                                                                                                                     | Methodological quality                           | Overall level of evidence <sup>a</sup> | Association with early functional recovery |
|-------------------------------|----------------------------------------------------------------------------------------------------------------------------------------------------------------------------------------|--------------------------------------------------|----------------------------------------|--------------------------------------------|
| Age                           | Elings et al. <sup>b</sup><br>Kennedy et al. 2006a, <i>ns</i><br>Kennedy et al. 2011, <i>ns</i><br>Kessler and Kafer, <i>ns</i><br>Morri et al. <sup>b</sup><br>Wang et al., <i>ns</i> | High<br>Medium<br>Low<br>Medium<br>Low<br>Medium | Conflicting                            | Unclear                                    |
| Sex                           | Elings et al. <sup>b</sup><br>Kennedy et al. 2006 <sup>b</sup><br>Kennedy et al. 2011, <i>ns</i><br>Kessler and Kafer <sup>b</sup><br>Morri et al. <sup>b</sup>                        | High<br>Medium<br>Low<br>Medium<br>Low           | Conflicting                            | Unclear                                    |
| BMI                           | Elings et al. <sup>b</sup><br>Kennedy et al. 2006, <i>ns</i><br>Kennedy et al. 2011, <i>ns</i><br>Kessler and Kafer, <i>ns</i>                                                         | High<br>Medium<br>Low<br>Medium                  | Conflicting                            | Unclear                                    |
| ASA                           | Elings et al. <sup>b</sup>                                                                                                                                                             | High                                             | Moderate                               | Yes                                        |
| Charnley class                | Elings et al. <sup>b</sup>                                                                                                                                                             | High                                             | Moderate                               | Yes                                        |
| Number of comorbidities       | Kennedy et al. 2006, <i>ns</i><br>Wang et al., <i>ns</i>                                                                                                                               | Medium<br>Medium                                 | Moderate                               | No                                         |
| TUG                           | Elings et al. <sup>b</sup><br>Kennedy et al. 2006 <sup>b</sup>                                                                                                                         | High<br>Medium                                   | Limited                                | Yes                                        |
| 6MWT                          | Kennedy et al. 2006 <sup>b</sup><br>Kennedy et al. 2011 <sup>b</sup>                                                                                                                   | Medium<br>Low                                    | Limited                                | Yes                                        |
| MBI                           | Wang et al. <sup>b</sup>                                                                                                                                                               | Medium                                           | Limited                                | Yes                                        |
| WOMAC                         | Kessler and Kafer <sup>b</sup><br>Salmon et al. 2001a, <i>ns</i>                                                                                                                       | Medium<br>Low                                    | Conflicting                            | Unclear                                    |
| Hip strength                  | Wang et al., <i>ns</i>                                                                                                                                                                 | Medium                                           | Limited                                | No                                         |
| Site of arthroplasty          | Kennedy et al. 2006 <sup>c</sup>                                                                                                                                                       | Medium                                           | Limited                                | Yes                                        |
| Incision size                 | Ogonda et al., <i>ns</i>                                                                                                                                                               | High                                             | Limited                                | No                                         |
| Anchorage of implant          | Kessler and Kafer, <i>ns</i>                                                                                                                                                           | Medium                                           | Limited                                | No                                         |
| Duration of surgery           | Kessler and Kafer, <i>ns</i>                                                                                                                                                           | Medium                                           | Limited                                | No                                         |

<sup>a</sup> The criteria used to rank levels of evidence is described in Methods section.  
<sup>b</sup> indicates significance at 0.05 level.  
<sup>c</sup> indicates significance according to the authors but level of significance not reported or determinable.  
ASA: American Society of Anesthesiologists, BMI: body mass index, MBI: Modified Barthel Index, *ns*: not significant, TUG: Timed Up and Go, WOMAC: Western Ontario and McMaster Universities Osteoarthritis Index, 6MWT: 6-minute walk test.

Table 6. Best evidence synthesis for total knee arthroplasty prognostic factors

| Individual prognostic factors                                 | Study ID, statistical significance                                                                                                                                 | Methodological quality           | Overall level of evidence <sup>a</sup> | Association with early functional recovery |
|---------------------------------------------------------------|--------------------------------------------------------------------------------------------------------------------------------------------------------------------|----------------------------------|----------------------------------------|--------------------------------------------|
| Age                                                           | Hoogeboom et al. <sup>b</sup><br>Kennedy et al. 2006, <i>ns</i><br>Maiorano et al. <sup>b</sup> for males, females, <i>ns</i><br>van der Sluis et al. <sup>b</sup> | High<br>Medium<br>Medium<br>High | Conflicting                            | Unclear                                    |
| Sex                                                           | Hoogeboom et al. <sup>b</sup><br>Kennedy et al. 2006 <sup>b</sup>                                                                                                  | High<br>Medium                   | Limited                                | Yes                                        |
| BMI                                                           | Hoogeboom et al. <sup>b</sup><br>Kennedy et al. 2006, <i>ns</i><br>Maiorano et al., <i>ns</i><br>van der Sluis et al., <i>ns</i>                                   | High<br>Medium<br>Medium<br>High | Conflicting                            | Unclear                                    |
| Bodyweight                                                    | Carli et al. <sup>b</sup>                                                                                                                                          | High                             | Limited                                | Yes                                        |
| ASA                                                           | Carli et al. <sup>b</sup><br>van der Sluis et al. <sup>b</sup>                                                                                                     | High<br>High                     | Strong                                 | Yes                                        |
| ISAR                                                          | van der Sluis et al. <sup>b</sup>                                                                                                                                  | High                             | Limited                                | Yes                                        |
| Charlson index                                                | Maiorano et al., <i>ns</i>                                                                                                                                         | Medium                           | Limited                                | No                                         |
| Number of comorbidities                                       | Kennedy et al. 2006, <i>ns</i>                                                                                                                                     | Medium                           | Limited                                | No                                         |
| TUG                                                           | Bade et al. <sup>b</sup><br>van der Sluis et al. <sup>b</sup><br>Kennedy et al. 2006 <sup>b</sup>                                                                  | High<br>High<br>Medium           | Strong                                 | Yes                                        |
| 2MWT                                                          | Carli et al. <sup>b</sup>                                                                                                                                          | High                             | Limited                                | Yes                                        |
| 6MWT                                                          | Kennedy et al. 2006 <sup>b</sup>                                                                                                                                   | Medium                           | Limited                                | Yes                                        |
| MBI                                                           | Maiorano et al. <sup>b</sup>                                                                                                                                       | Medium                           | Limited                                | Yes                                        |
| DEMMI                                                         | van der Sluis et al. <sup>b</sup>                                                                                                                                  | High                             | Limited                                | Yes                                        |
| Anesthesia type:<br>– continuous FNB<br>– periarticular LIA   | Carli et al., <i>ns</i>                                                                                                                                            | High                             | Limited                                | No                                         |
| Anesthesia type:<br>– overnight FNB<br>– 4-day ambulatory FNB | Ilfeld et al., <i>ns</i>                                                                                                                                           | Medium                           | Limited                                | No                                         |
| Morphine use                                                  | Hoogeboom et al., <i>ns</i>                                                                                                                                        | High                             | Limited                                | No                                         |
| Fast-track protocol <sup>d</sup>                              | Den Hertog et al. <sup>b</sup><br>(results reported for per protocol cohort only)                                                                                  | High                             | Limited                                | Yes                                        |
| Fast-track protocol <sup>e</sup>                              | Fransen et al. <sup>b</sup>                                                                                                                                        | Medium                           |                                        |                                            |
| Site of arthroplasty                                          | Kennedy et al. 2006 <sup>c</sup>                                                                                                                                   | Medium                           | Limited                                | Yes                                        |
| Tourniquet time                                               | Hoogeboom et al., <i>ns</i>                                                                                                                                        | High                             | Limited                                | No                                         |
| Blood loss                                                    | Hoogeboom et al., <i>ns</i>                                                                                                                                        | High                             | Limited                                | No                                         |
| Surgeon experience                                            | Hoogeboom et al., <i>ns</i>                                                                                                                                        | High                             | Limited                                | No                                         |

<sup>a</sup>, <sup>b</sup>, <sup>c</sup> See Table 5, <sup>d</sup> See Table 4 <sup>c</sup>, and <sup>e</sup> See Table 4 <sup>d</sup>.

ASA: American Society of Anesthesiologists, BMI: body mass index, DEMMI: de Morton Mobility Index, FNB: femoral nerve block, ISAR: Identification of Seniors At Risk, LIA: local infiltration anesthesia, MBI :Modified Barthel Index, *ns*: not significant, TUG: Timed Up and Go, 2MWT: 2-minute walk test, 6MWT: 6-minute walk test.

## Appendix 1. Search strategy for PubMed/MEDLINE

| Database                               | Search strategy                                                                                                                                                                                                                                    |
|----------------------------------------|----------------------------------------------------------------------------------------------------------------------------------------------------------------------------------------------------------------------------------------------------|
| PubMed/MEDLINE<br>Searching all fields | (predict* OR prognos* OR "Forecasting"<br>[Mesh]) AND ((arthroplast* OR replace* OR<br>prosthes*) AND (lower limb OR hip OR knee)<br>OR ("Arthroplasty, Replacement, Hip"[Mesh]<br>OR "Arthroplasty, Replacement, Knee"[Mesh]))<br>AND (function*) |

## Appendix 2. CASP checklist modification and scoring for methodological quality

CASP checklist questions were re-worded as follows:

Question 7 of CASP checklists (Case Control Study, Cohort Study and Randomized Controlled Trial), "What are the results of this study?" was adjusted to read "Was the treatment effect size worthwhile for the context and population in which it is intended it would be applied?"

Question 8 of CASP checklists (Case Control Study, Cohort Study and Randomized Controlled Trial) "How precise are the results?" was altered to read "Did the confidence limits around the treatment effect indicate that the minimum expected effect would be worthwhile in this context and population?"

Question 12 of CASP checklist (Cohort Study) "What are the implications of this study for practice?" was modified to read "Are there implications of this study for practice?"

## Appendix 3. CASP checklist scores for individual studies

| Study ID                  | Checklist    | Q1 | Q2 | Q3 | Q4 | Q5 | Q6 | Q7 | Q8 | Q9 | Q10 | Q11 | Q12 | Total score | Percent -age |       |    |
|---------------------------|--------------|----|----|----|----|----|----|----|----|----|-----|-----|-----|-------------|--------------|-------|----|
| Bade et al. 2014          | Cohort       | 1  | 1  | 1  | 1  | 1  | 1  | 1  | 1  | 1  | 1   | 0   | 1   | 1           | 13 /14       | 93    |    |
| Elings et al. 2016        | Cohort       | 1  | 1  | 1  | 1  | 1  | 1  | 1  | 1  | 1  | 1   | 1   | 1   | 1           | 14 /14       | 100   |    |
| Hoogeboom et al. 2015     | Cohort       | 1  | 1  | 1  | 1  | 0  | 0  | 1  | 1  | 1  | 1   | 1   | 0   | 1           | 11 /14       | 79    |    |
| Kennedy et al. 2006a      | Cohort       | 1  | 1  | 0  | 1  | 0  | 0  | 1  | 1  | 0  | 0   | 0   | 0   | 0           | 5 /14        | 38    |    |
| Kennedy et al. 2011       | Cohort       | 1  | 0  | 0  | 1  | 0  | 0  | 0  | 1  | 0  | 1   | 0   | 0   | 0           | 4 /14        | 29    |    |
| Kessler and Kafer 2007    | Cohort       | 1  | 1  | 0  | 1  | 0  | 0  | 1  | 1  | 0  | 1   | 0   | 0   | 0           | 6 /14        | 43    |    |
| Maiorano et al. 2017      | Cohort       | 1  | 0  | 1  | 1  | 0  | 0  | 1  | 0  | 0  | 1   | 0   | 0   | 0           | 5 /14        | 38    |    |
| Morri et al. 2016         | Cohort       | 1  | 0  | 0  | 0  | 0  | 0  | 0  | 0  | 1  | 1   | 0   | 0   | 1           | 4 /14        | 29    |    |
| Salmon et al. 2001a       | Cohort       | 1  | 0  | 0  | 0  | 0  | 0  | 1  | 1  | 0  | 0   | 0   | 0   | 0           | 3 /14        | 21    |    |
| Van der Sluis et al. 2017 | Cohort       | 1  | 1  | 1  | 1  | 1  | 1  | 1  | 1  | 0  | 1   | 1   | 1   | 1           | 13 /14       | 93    |    |
| Wang et al. 1998          | Cohort       | 1  | 1  | 0  | 1  | 0  | 0  | 0  | 1  | 0  | 1   | 0   | 0   | 1           | 7 /14        | 50    |    |
| Carli et al. 2010         | RCT          | 1  | 1  | 1  | 1  | 1  | 1  | 1  | 1  | 1  | 1   | 1   | 1   | 1           | 11 /11       | 100   |    |
| Carmichael et al. 2018    | RCT          | 1  | 1  | 1  | 1  | 1  | 1  | 1  | 0  | 0  | 0   | 1   | 0   | N/A         | 7 /11        | 64    |    |
| Fransen et al. 2018       | RCT          | 1  | 1  | 1  | 0  | 1  | 1  | 1  | 0  | 0  | 0   | 0   | 1   | N/A         | 6 /11        | 55    |    |
| Ilfeld et al. 2001        | RCT          | 1  | 1  | 1  | 1  | 0  | 1  | 1  | 1  | 1  | 0   | 0   | 0   | N/A         | 7 /11        | 64    |    |
| Ogonda et al. 2005        | RCT          | 1  | 1  | 1  | 1  | 1  | 1  | 1  | 1  | 0  | 0   | 1   | 1   | N/A         | 9 /11        | 82    |    |
| Den Hertog et al. 2012    | Case control | 1  | 1  | 1  | 1  | 1  | 1  | 1  | 1  | 0  | 0   | 0   | 1   | 1           | N/A          | 9 /12 | 75 |

## Appendix 4. Outcome measures assessing inpatient functional recovery

| Study ID               | Outcome measure                                             | Tasks assessed                                                                                                                                                                                                                                                                                                                         | ICF               | Discharge criteria                                                                                                                                                                          | LOS range, mean (days)             |
|------------------------|-------------------------------------------------------------|----------------------------------------------------------------------------------------------------------------------------------------------------------------------------------------------------------------------------------------------------------------------------------------------------------------------------------------|-------------------|---------------------------------------------------------------------------------------------------------------------------------------------------------------------------------------------|------------------------------------|
| Bade et al. 2014       | TUG <sup>a</sup>                                            | Sit to stand<br>Walking speed<br>Ability to turn/change direction                                                                                                                                                                                                                                                                      | A                 | Nil                                                                                                                                                                                         | NR                                 |
| Carli et al. 2010      | 2MWT <sup>a</sup>                                           | Walking speed<br>Ability to turn/change direction                                                                                                                                                                                                                                                                                      | A                 | Nil                                                                                                                                                                                         | 4–6<br>5                           |
| Carmichael et al. 2013 | WOMAC <sup>b</sup>                                          | Toilet transfers<br>Bath transfers<br>Donning/doffing socks<br>Sit to stand (from bed and chair)<br>Walking<br>Ability to negotiate stairs<br>Bending to floor<br>Light and heavy domestic duties<br>Car transfers<br>Shopping                                                                                                         | A                 | Nil                                                                                                                                                                                         | NR                                 |
| Den Hertog et al. 2012 | WOMAC <sup>b</sup><br>AKSS <sup>a</sup>                     | Toilet transfers<br>Bath transfers<br>Donning/doffing socks<br>Sit to stand (from bed and chair)<br>Walking<br>Ability to negotiate stairs<br>Bending to floor<br>Light and heavy domestic duties<br>Car transfers<br>Shopping<br>Distance walked (AKSS)<br>Stairs (AKSS)<br>Use of walking aid (AKSS)                                 | P, A              | Patient confident for discharge. Low-moderate pain. No wound ooze. Independent in ADL (transfers, hygiene). Independently mobile with aid > 250 m.                                          | NR<br>6.75 (FT)<br>13.2 (RP)       |
| Elings et al. 2016     | mILAS <sup>a</sup><br>(scored 0–24)                         | Supine to sitting<br>Sitting to supine<br>Sit to stand<br>Walking                                                                                                                                                                                                                                                                      | A                 | Medically fit mILAS < 1. Necessary care arranged for discharge.                                                                                                                             | NR                                 |
| Fransen et al. 2018    | TUG <sup>a</sup><br>SF-12 <sup>b</sup><br>KOOS <sup>b</sup> | Sit to stand<br>Walking speed<br>Ability to turn/change direction<br>Rolling over<br>Toilet transfers<br>Bath transfers<br>Donning/doffing socks<br>Sit to stand (from bed and chair)<br>Walking on an even surface<br>Ability to negotiate stairs<br>Bending to floor<br>Light and heavy domestic duties<br>Car transfers<br>Shopping | A<br>P, A<br>P, A | Able to walk independently with 2x crutches or a walker.<br>No wound problems.<br>Adequate social support.                                                                                  | NR<br>3.7 (FT)<br>4.7 (RP)         |
| Hoogeboom et al. 2015  | mILAS <sup>a</sup><br>(scored 0–24)                         | Supine to sitting<br>Sit to stand<br>Walking<br>Stair climbing                                                                                                                                                                                                                                                                         | A                 | NR, considered functionally independent if mILAS < 6.                                                                                                                                       | NR<br>2                            |
| Ilfeld et al. 2008     | 6MWT <sup>a</sup>                                           | Walking speed<br>Ability to turn/change direction                                                                                                                                                                                                                                                                                      | A                 | Adequate analgesia (NRS < 4).<br>No IV opioids ≥ 12 hours.<br>Ability to mobilize > 30 m.<br>Discharge at surgeon's discretion upon fulfilment of criteria and not prior to 10.00 on POD 3. | NR<br>3.5 (placebo)<br>3.6 (Ropiv) |



## Appendix 4 continued

| Study ID               | Outcome measure                                                                     | Tasks assessed                                                                                                                                                                                                                                                                                                                                                                                                                         | ICF            | Discharge criteria                                                                           | LOS range, mean (days)                              |
|------------------------|-------------------------------------------------------------------------------------|----------------------------------------------------------------------------------------------------------------------------------------------------------------------------------------------------------------------------------------------------------------------------------------------------------------------------------------------------------------------------------------------------------------------------------------|----------------|----------------------------------------------------------------------------------------------|-----------------------------------------------------|
| Kennedy et al. 2006    | TUG <sup>a</sup><br>6MWT <sup>a</sup><br>WOMAC <sup>b</sup>                         | Sit to stand (from bed and chair)<br>Walking speed<br>Ability to turn/change direction<br>Toilet transfers<br>Bath transfers<br>Donning/doffing socks<br>Walking<br>Ability to negotiate stairs<br>Bending to floor<br>Light and heavy domestic duties<br>Car transfers<br>Shopping                                                                                                                                                    | A<br>A<br>P, A | NR                                                                                           | NR                                                  |
| Kennedy et al. 2011    | 6MWT <sup>a</sup><br>LEFS <sup>b</sup>                                              | Walking speed<br>Ability to turn/change direction<br>Rolling over<br>Bath transfers<br>Donning/doffing socks and shoes<br>Walking (in home)<br>Squatting<br>Car transfers<br>Light and heavy domestic duties<br>Lifting objects (from floor)<br>Sitting and standing for 1 hour<br>Walking (2 blocks)<br>Walking 1 mile<br>Work<br>Hobbies/sports<br>Running on even and uneven ground<br>Making sharp turns whilst running<br>Hopping | A<br>A         | NR                                                                                           | 5–7<br>NR                                           |
| Kessler and Kafer 2007 | WOMAC <sup>b</sup>                                                                  | Toilet transfers<br>Bath transfers<br>Donning/doffing socks<br>Sit to stand (from bed and chair)<br>Walking<br>Ability to negotiate stairs<br>Bending to floor<br>Light and heavy domestic duties<br>Car transfers<br>Shopping                                                                                                                                                                                                         | P, A           | NR                                                                                           | 10–14<br>10.2                                       |
| Maiorano et al. 2017   | MBI <sup>a</sup>                                                                    | Bed to chair transfers<br>Ability to mobilize ( $\pm$ walking aid)<br>Ability to negotiate stairs<br>Dressing<br>Grooming<br>Feeding<br>Bathing<br>Toileting<br>Bladder and bowel continence                                                                                                                                                                                                                                           | P, A           | Independent bed to chair transfers. Negotiating stairs with crutches. Managing personal care | NR<br>15.3 (f)<br>13.4 (m)                          |
| Morri et al. 2016      | ILAS <sup>a</sup><br>(scored 0–50)<br>NB: should generate score of 0–36 for 6 tasks | Supine to sitting<br>Sit to stand<br>Walking<br>Stair climbing<br>Gait speed<br>Type of walking aid used                                                                                                                                                                                                                                                                                                                               | A, E           | NR                                                                                           | NR<br>5.6<br>(19 patients excluded as LOS > 7 days) |

## Appendix 4 continued

| Study ID                  | Outcome measure                                                                                       | Tasks assessed                                                                                                                                                                          | ICF | Discharge criteria                                                                  | LOS range, mean (days)                 |
|---------------------------|-------------------------------------------------------------------------------------------------------|-----------------------------------------------------------------------------------------------------------------------------------------------------------------------------------------|-----|-------------------------------------------------------------------------------------|----------------------------------------|
| Ogonda et al. 2005        | mILAS <sup>a</sup> (scored 0–18)<br>10mWT <sup>a</sup><br>SCT (ascending and descending) <sup>a</sup> | Supine to sitting<br>Sit to stand<br>Walking<br>Walking speed<br>Speed and ability to negotiate stairs                                                                                  | A   | NR                                                                                  | 2–13<br>3.65 (SI)<br>2–22<br>3.68 (RI) |
| Salmon et al. 2001a       | 10mWT <sup>a</sup><br>25mWT <sup>a</sup>                                                              | Walking speed                                                                                                                                                                           | A   | Not stated, implied: independent with walking aid, negotiating stairs (if required) | NR<br>19                               |
| Van der Sluis et al. 2017 | mILAS <sup>a</sup> (scored 0–30)                                                                      | Supine to sitting<br>Sitting to supine<br>Sit to stand<br>Walking<br>Stair climbing                                                                                                     | A   | Not stated, implied: considered functionally recovered once mILAS ≤ 6               | NR                                     |
| Wang et al. 1998          | MBI <sup>a</sup>                                                                                      | Bed to chair transfers<br>Ability to mobilize (± walking aid)<br>Ability to negotiate stairs<br>Dressing<br>Grooming<br>Feeding<br>Bathing<br>Toileting<br>Bladder and bowel continence | A   | MBI ≥ 90, unclear if any other criteria used                                        | 5–39<br>NR                             |

<sup>a</sup> Functional performance outcome measure.

<sup>b</sup> Patient-reported outcome measure.

ADL: activities of daily living, AKSS: American Knee Society Score, f: female, FT: fast-track protocol, ICF: International Classification of Function, Disability and Health, ILAS: Iowa Level of Assistance Scale, KOOS: Knee injury and Osteoarthritis Outcome Score, LEFS: Lower Extremity Functional Scale, m: male, MBI: Modified Barthel Index, mILAS: Modified Iowa Level of Assistance Scale, NR: not reported, NRS: numerical rating scale, RI: routine incision, POD: postoperative day, Ropiv: ropivacaine group, RP: regular protocol, SCT: stair climbing test, SF-12: Short form 12 health survey, SI: small incision, TUG: Timed Up and Go, WOMAC: Western Ontario and McMaster Universities Osteoarthritis Index, 2MWT: 2-minute walk test, 6MWT: 6-minute walk test, 10mWT: 10-meter walk test, 25mWT: 25-meter walk test.
